# Supplementary material
Source: ML conference proceedings conference paper supplement (https://aclanthology.org/D19-1389)
Supplement: Attachment [file D19-1389.Attachment.zip]

## 9 Appendix

### A Derivation of $\mathcal{BottleSum}^{Ex}$ Loss

This is a derivation of the loss equation (3) used in section 2, starting with the Information Bottleneck (IB) loss given in eq 2:

$$I(\tilde{S}; S) - \beta I(\tilde{S}; Y), \quad (4)$$

The goal here is to consider how to interpret this equation when we only have access to single values of source  $S$  and relevance variable  $Y$  at a time. In the original IB formulation, a distribution  $p(\tilde{S}|S)$  to go from sources to summaries is learned by optimizing this expression across the distribution of source-target pairs  $(s, y)$ . In the case of  $\mathcal{BottleSum}^{Ex}$ , the goal is to consider this expression on a case-by-case basis, not requiring training over a large distribution of pairs.

First, we consider an alternate form of the equation above:

$$I(\tilde{S}; S) - \beta I(\tilde{S}; Y) = \mathbb{E}_{S, \tilde{S}}[pmi(\tilde{S}; S)] - \beta \mathbb{E}_{Y, \tilde{S}}[pmi(\tilde{S}; Y)] \quad (5)$$

where  $pmi(x, y) = \frac{p(x, y)}{p(x)p(y)}$  denotes pointwise mutual information.

$$= \mathbb{E}_{S, \tilde{S}}[pmi(\tilde{S}; S)] - \beta \mathbb{E}_{Y, \tilde{S}}[pmi(\tilde{S}; Y)] \quad (6)$$

As stated above, we want to consider this for only single values of  $s$  and  $y$  at a time, so for these values we can investigate the applicable terms of these expectations:

$$= \sum_{\tilde{s}} \left[ p(s, \tilde{s}) pmi(\tilde{S}; S) - \beta p(y, \tilde{s}) pmi(\tilde{S}; Y) \right] \quad (7)$$

This is the expression we are then aiming to optimize, as it covers all terms in the original IB objective that we have access to on a case-by-case basis.

As in the original IB problem, we can think of learning a distribution  $p(\tilde{s}|s)$ . However, we are now only taking an expectation over  $\tilde{S}$  and so we simply collapse all probability onto the setting of  $\tilde{s}$  that optimizes this expression. Simply:

$$p(\tilde{s}|s) = 1 \text{ for chosen summary, } 0 \text{ otherwise} \quad (8)$$

This results in finding  $\tilde{s}$  that optimizes:

$$\begin{aligned} & p(s, \tilde{s}) pmi(\tilde{S}; S) - \beta p(y, \tilde{s}) pmi(\tilde{S}; Y) \\ &= p(s, \tilde{s}) \log \frac{p(s, \tilde{s})}{p(s)p(\tilde{s})} - \beta p(y, \tilde{s}) \log \frac{p(y, \tilde{s})}{p(y)p(\tilde{s})} \end{aligned} \quad (9)$$

Any terms that rely only on  $s$  and  $y$  will be constant and so can be collected into coefficients. As well, remember that we set  $p(\tilde{s}|s) = 1$ . Doing rearranging:

$$\begin{aligned} &= p(\tilde{s}|s)p(s) \log \frac{p(\tilde{s}|s)}{p(\tilde{s})} - \beta p(y|\tilde{s})p(\tilde{s}) \log \frac{p(y|\tilde{s})}{p(y)} \\ &= c_1 \log \frac{1}{p(\tilde{s})} - \beta p(y|\tilde{s})p(\tilde{s}) \log p(y|\tilde{s}) - c_2 \end{aligned} \quad (10)$$

This is equivalent to optimizing:

$$\log \frac{1}{p(\tilde{s})} - \beta_1 p(y|\tilde{s})p(\tilde{s}) \log p(y|\tilde{s}) \quad (11)$$

for some positively signed  $\beta_1$ .
